# Supplementary material for: Evaluation of Different Capture Solutions for Ammonia Recovery in Suspended Gas Permeable Membrane Systems
Source: MDPI journal article supplement (doi:10.3390/membranes12060572), 2022-05-31
Supplement: s1 [file s1]

# Evaluation of different adsorbents for ammonia recovery in suspended gas permeable membrane systems

M. Soto-Herranz, M. Sánchez-Báscones, J.M. Antolín-Rodríguez and P. Martín-Ramos

## SUPPLEMENTARY MATERIALS

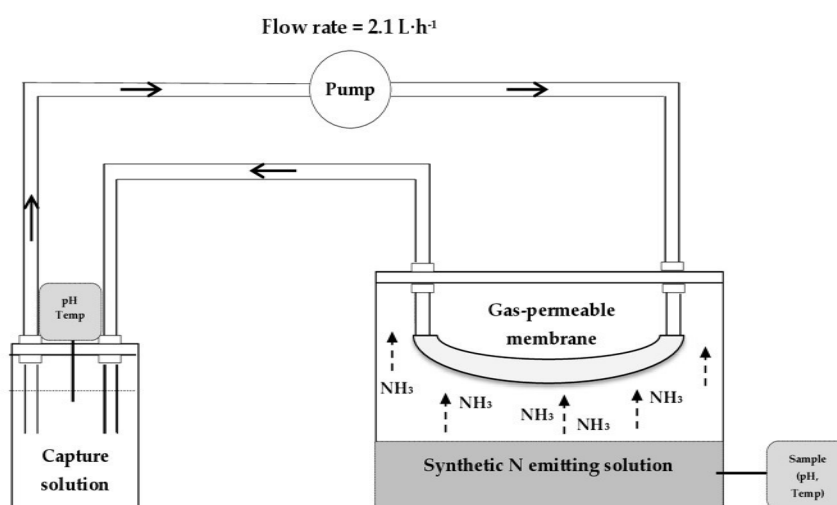

**Figure S1.** Scheme of the  $\text{NH}_3$  capture process by the suspended gas-permeable membrane system in a closed circuit using different trapping solutions at  $25^\circ\text{C}$ . Reproduced from [Membranes, 2021, 11(7):538; DOI: 10.3390/membranes11070538] under CC BY 4.0 license.

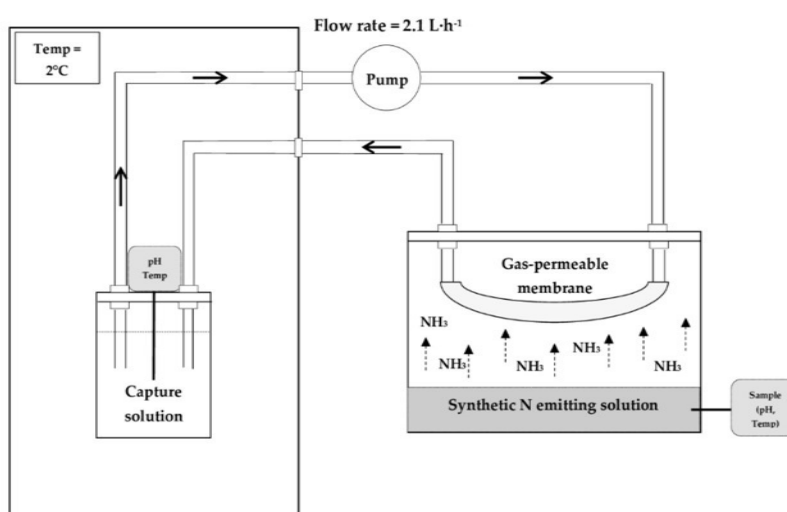

**Figure S2.** Scheme of the  $\text{NH}_3$  capture process by the suspended gas-permeable membrane system in a closed circuit using different trapping solutions at  $2^\circ\text{C}$ . Adapted from [Membranes, 2021, 11(7):538; DOI: 10.3390/membranes11070538] under CC BY 4.0 license.

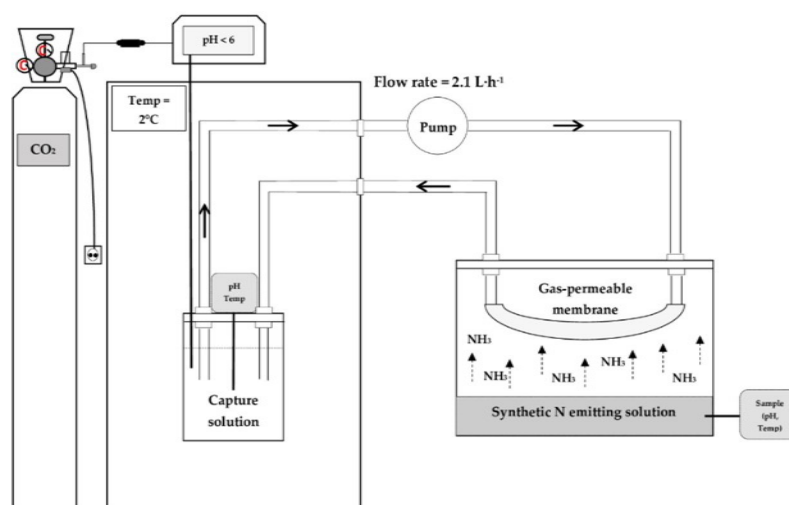

**Figure S3.** Scheme of the  $\text{NH}_3$  capture process by the suspended gas-permeable membrane system in a closed circuit using carbonic acid as the ammonia trapping solution at 2 °C. Reproduced from [Membranes, 2021, 11(7):538; DOI: 10.3390/membranes11070538] under CC BY 4.0 license.

**Table S1.** Characteristics of the e-PTFE membrane used in the experiments.

|                                             |                |
|---------------------------------------------|----------------|
| Length (cm)                                 | 100            |
| Outer diameter (mm)                         | 5.2            |
| Width of the wall (mm)                      | 0.64           |
| Polymer density ( $\text{g}/\text{cm}^3$ )  | 0.95           |
| Porosity (%)                                | < 60           |
| Average pore size length ( $\mu\text{m}$ )* | $12.7 \pm 5.9$ |
| Average pore size width ( $\mu\text{m}$ )*  | $1.3 \pm 0.9$  |
| Absorption surface ( $\text{cm}^2$ )        | 163.4          |

\* Pore sizes are average values across 10 membrane samples characterized by Scanning Electron Microscopy (SEM).

**Table S2.** Summary of operation and chemical costs, as well as end-product market prices, for the eight ammonia trapping solutions under analysis.

| <b>Operation costs</b>                       |                     |
|----------------------------------------------|---------------------|
| <i>Pumpdrive 5001 peristaltic pump</i>       |                     |
| Electrical consumption (kWh)                 | 0.1                 |
| Cost (€/kWh)                                 | 0.3                 |
| Weekly electrical consumption (kW/7d)        | 16.8                |
| Weekly cost (€/7d)                           | 5.0                 |
| <b>Chemical costs</b>                        |                     |
| <i>Acid consumption</i>                      |                     |
| Sulphuric acid (g)                           | 51.3                |
| Phosphoric acid (g)                          | 38.3                |
| Nitric acid (g)                              | 96.6                |
| Carbonic acid (g)                            | 59.1                |
| Acetic acid (g)                              | 60.1                |
| Citric acid (g)                              | 64.0                |
| Maleic acid (g)                              | 58.6                |
| <i>Acid cost</i>                             |                     |
| Sulphuric acid (€/L) / (€/kg)                | 47.6 / 87.1         |
| Phosphoric acid (€/L) / (€/kg)               | 44.9 / 80.4         |
| Nitric acid (€/L) / (€/kg)                   | 37.4 / 52.0         |
| Carbonic acid (€/L) / (€/kg)                 | - / 89.5            |
| Acetic acid (€/L) / (€/kg)                   | 46.4 / 48.7         |
| Citric acid (€/kg)                           | - / 81.2            |
| Maleic acid (€/Kg)                           | - / 105.8           |
| <b>Fertilizer bulk prices</b>                |                     |
| Ammonium sulphate 21% (€/kg)                 | 0.69 <sup>[1]</sup> |
| Diammonium Phosphate (DAP) 18-46-0 (€/kg)    | 1.09 <sup>[1]</sup> |
| Ammonium nitrate 34,5% (€/kg)                | 1.08 <sup>[2]</sup> |
| Ammonium bicarbonate 99-100% (€/kg)          | 0.93 <sup>[3]</sup> |
| Ammonium acetate 99% (€/kg)                  | 1.11 <sup>[3]</sup> |
| Ammonium citrate > 90% (€/kg)                | 1.06 <sup>[3]</sup> |
| Ammonium maleate (€/Kg)                      | 2.76 <sup>[4]</sup> |
| NH <sub>3</sub> ·H <sub>2</sub> O 25% (€/kg) | 1.30 <sup>[3]</sup> |

The prices of the end products have been obtained from the suppliers listed below:

<sup>1</sup> North Carolina Dept of Ag-USDA Market News Service, 2022. Available online at:

[https://mymarketnews.ams.usda.gov/filerepo/sites/default/files/3159/2022-04-14/579600/ams\\_3159\\_00112.txt](https://mymarketnews.ams.usda.gov/filerepo/sites/default/files/3159/2022-04-14/579600/ams_3159_00112.txt) (accessed 14 April 2022).

<sup>2</sup> Almacenes Antonio Guerrero. Agricultura y Ganadería-Convencional y Ecológica, 2022. Available online at: <https://www.almacenesantonioguerrero.es/productos/nitrato-345-25kg/%0A.Best-price-In-stock/2051660.html> (accessed 16 April 2022).

<sup>3</sup> Various suppliers, 2022. Available online: <https://www.made-in-china.com/> (accessed 14 April 2022).

<sup>4</sup> Hangzhou LookChem Network Technology Co. Ltd. Available online at: [https://www.lookchem.com/product\\_Ammonium-hydrogen-maleate-Manufacturer-High-quality-Best-price-In-stock/2051660.html](https://www.lookchem.com/product_Ammonium-hydrogen-maleate-Manufacturer-High-quality-Best-price-In-stock/2051660.html) (accessed 16 April 2022).
